# Supplementary material for: Responses of the Physiological and Biochemical Characteristics of Alfalfa Roots with Different Root Collar Diameters to Low Temperatures Under Simulated Winter Irrigation
Source: Research Square preprint supplement (doi:10.21203/rs.3.rs-583000/v1), 2021-06-16
Supplement: Supplementary file 1 [file 82a82cd9bef853d2560e7b59.xlsx]

## Sheet: Sheet1
Treatment			4	5	6	7	8	9	10	11	12	13	14
Root collar diameter (cm)	low-temperature stress (℃)	Simulated winter irrigation (ml)	Relative conductivity(%)	Root collar activity(μg·g-1·h-1)	Soluble sugar(mg·g-1)	Starch (mg·g-1)	Free amino acid(mg·g-1)	Soluble protein (mg·g-1)	Superoxide dismutase (U·g-1 FW)	Peroxidase (U·min-1·g-1 FW)	Catalase (U·min-1·g-1 FW)	Malondialdehyde (nmol·ml-1 FM)	C/N
3.5	4	0	20.8696	0.986645	115.2	37.2	3.87857	19.5098	159.463	1336	51.3333	18.0712	6.51606
3.5	4	0	17.6923	1.04609	129.867	35.4667	3.97646	22.6797	160.195	1380	34.6667	13.9532	6.20244
3.5	4	0	23.3333	0.945602	112.133	42.8	3.91032	21.8301	158.73	1388	32	12.8124	6.01908
5.25	4	0	22.1239	0.893236	112.933	29.7333	3.64841	27.4183	148.962	1213.6	47.3333	20.988	4.59227
5.25	4	0	16	1.11968	85.4667	26	3.62725	23.6601	188.034	1452	42	12.5644	4.08492
5.25	4	0	22.9508	0.988061	80.5333	21.7333	4.15106	29.0196	163.126	1096	30	15.57	3.08305
7	4	0	24.7525	0.822471	99.6	30.5333	3.56905	27.3529	163.614	1248	26.6667	16.368	4.20844
7	4	0	14.2857	0.832378	138.533	38	3.95529	31.5033	185.592	1140	31.3333	14.7744	4.97858
7	4	0	9.34579	0.918711	119.467	39.3333	4.96587	27.7124	188.034	1318.4	29.3333	11.7124	4.8595
3.5	4	20	20.8696	0.986645	115.2	37.2	3.87857	19.5098	159.463	1336	51.3333	18.0712	6.51606
3.5	4	20	17.6923	1.04609	129.867	35.4667	3.97646	22.6797	160.195	1380	34.6667	13.9532	6.20244
3.5	4	20	23.3333	0.945602	112.133	42.8	3.91032	21.8301	158.73	1388	32	12.8124	6.01908
5.25	4	20	22.1239	0.893236	112.933	29.7333	3.64841	27.4183	148.962	1213.6	47.3333	20.988	4.59227
5.25	4	20	16	1.11968	85.4667	26	3.62725	23.6601	188.034	1452	42	12.5644	4.08492
5.25	4	20	22.9508	0.988061	80.5333	21.7333	4.15106	29.0196	163.126	1096	30	15.57	3.08305
7	4	20	24.7525	0.822471	99.6	30.5333	3.56905	27.3529	163.614	1248	26.6667	16.368	4.20844
7	4	20	14.2857	0.832378	138.533	38	3.95529	31.5033	185.592	1140	31.3333	14.7744	4.97858
7	4	20	9.34579	0.918711	119.467	39.3333	4.96587	27.7124	188.034	1318.4	29.3333	11.7124	4.8595
3.5	4	40	20.8696	0.986645	115.2	37.2	3.87857	19.5098	159.463	1336	51.3333	18.0712	6.51606
3.5	4	40	17.6923	1.04609	129.867	35.4667	3.97646	22.6797	160.195	1380	34.6667	13.9532	6.20244
3.5	4	40	23.3333	0.945602	112.133	42.8	3.91032	21.8301	158.73	1388	32	12.8124	6.01908
5.25	4	40	22.1239	0.893236	112.933	29.7333	3.64841	27.4183	148.962	1213.6	47.3333	20.988	4.59227
5.25	4	40	16	1.11968	85.4667	26	3.62725	23.6601	188.034	1452	42	12.5644	4.08492
5.25	4	40	22.9508	0.988061	80.5333	21.7333	4.15106	29.0196	163.126	1096	30	15.57	3.08305
7	4	40	24.7525	0.822471	99.6	30.5333	3.56905	27.3529	163.614	1248	26.6667	16.368	4.20844
7	4	40	14.2857	0.832378	138.533	38	3.95529	31.5033	185.592	1140	31.3333	14.7744	4.97858
7	4	40	9.34579	0.918711	119.467	39.3333	4.96587	27.7124	188.034	1318.4	29.3333	11.7124	4.8595
3.5	-10	0	32.2222	0.649804	131.333	62	3.31508	26.0784	194.373	1063.2	52	16.996	6.57742
3.5	-10	0	28.8288	0.540826	140	59.6	4.16693	26.4052	191.793	1063.2	63.3333	19.4068	6.52882
3.5	-10	0	29.4118	0.856438	131.067	61.7333	4.11667	23.4314	194.709	1379.2	37.3333	23.962	6.99868
5.25	-10	0	28.5714	0.502613	124.267	52.9333	3.79921	26.3725	185.166	1484	44	20.4064	5.87304
5.25	-10	0	34.3434	0.288903	127.733	53.7333	3.52143	28.0392	160.443	1387.2	44.6667	17.7476	5.74978
5.25	-10	0	29.5918	0.41911	128.8	54.4	3.0082	27.2222	148.571	1333.6	45.3333	22.5532	6.06012
7	-10	0	29.1667	0.955509	121.6	36	4.0082	29.1176	145.269	1775.2	48.6667	16.6816	4.75761
7	-10	0	32.4074	0.802656	134.8	39.3333	3.46323	31.0458	148.64	1728.8	57.3333	15.6928	5.04603
7	-10	0	26.9231	1.33056	134	69.0667	3.27011	28.8889	163.81	1241.6	51.3333	16.3356	6.31446
3.5	-10	20	31.1828	0.593192	118.4	59.2	3.89709	23.3007	200.512	1100	58.6667	12.8988	6.52995
3.5	-10	20	26.3158	0.825301	118.4	60.2667	3.79392	19.2157	182.941	990.4	45.3333	14.9412	7.76487
3.5	-10	20	24.5098	1.00221	136.933	53.7333	3.58757	21.9935	190.053	1147.2	42	14.7836	7.45344
5.25	-10	20	35.9551	0.89182	111.333	45.0667	3.47116	22.8758	151.748	1631.2	62	19.42	5.93616
5.25	-10	20	29.8387	0.959755	111.067	40.6667	2.87593	31.3725	157.492	1731.2	48	14.7968	4.43037
5.25	-10	20	28.1818	0.788503	107.2	33.2	3.46323	28.7582	201.058	1137.6	44	16.6592	4.35735
7	-10	20	27.957	0.784258	131.067	51.6	3.0955	30.9804	168.116	1328.8	48.6667	23.4916	5.36058
7	-10	20	28.1553	0.552148	142.267	63.8667	3.07698	31.1438	156.017	1791.2	46.6667	20.3724	6.02363
7	-10	20	28.7234	0.746044	136.8	55.3333	2.89709	29.902	142.222	1382.4	54	22	5.85789
3.5	-10	40	38.9474	0.789919	124.933	53.6	3.83889	26.3725	200.512	1574.4	41.3333	11.1268	5.90946
3.5	-10	40	30.303	0.586116	116.133	50.1333	3.90238	26.8954	184.786	1161.6	52.6667	14.0444	5.39865
3.5	-10	40	41.5842	0.753121	109.467	53.8667	3.40767	24.1176	201.481	1396.8	39.3333	16.3	5.93393
5.25	-10	40	30.1075	0.661126	119.6	54.6667	2.74365	21.6993	184.825	1480	52.33	15.9408	7.12951
5.25	-10	40	27.3684	0.802656	109.2	44.6667	2.97381	18.5621	87.4136	1320.8	56	17.0072	7.14466
5.25	-10	40	31.4815	0.830962	122	48.1333	2.8918	23.4641	166.349	1198.4	189.333	15.9596	6.45524
7	-10	40	36.4583	0.881913	136.133	47.6	3.22249	28.0719	187.553	1086.4	47.3333	10.8356	5.87113
7	-10	40	34.4086	0.805487	126.4	59.6	3.22249	28.8562	178.147	1721.6	60	19.7732	5.79824
7	-10	40	33.6735	0.596023	143.467	55.7333	3.19339	35.0654	182.85	1103.2	54	16.7696	5.20665
3.5	-15	0	66.3043	0.322779	125.2	54.5333	3.80979	19.085	221.918	1122.4	38.66	10.9336	7.85041
3.5	-15	0	66.6667	0.34967	146.933	64.1333	3.71984	21.1765	185.606	1262.4	36.6667	9.4636	8.47783
3.5	-15	0	63.1579	0.167096	149.6	72.6667	3.68016	17.3203	184.557	1674.4	40.6667	11.9656	10.5839
5.25	-15	0	45.0549	0.285981	94.6667	48.6667	3.52672	21.1438	170.776	1111.2	50.6667	9.3416	5.80991
5.25	-15	0	51.4563	0.32844	99.8667	57.6	3.06376	21.732	187.121	1599.2	44	10.7444	6.35054
5.25	-15	0	47.3684	0.395667	84.8	54.1333	3.25423	18.4314	209.416	1120	54.6667	13.6936	6.40671
7	-15	0	48.1481	0.90659	115.733	37.3333	2.64577	22.0915	183.562	1193.6	68	22.5004	6.18769
7	-15	0	31.6239	0.545689	102.933	52	2.71984	19.5098	187.121	1419.2	62	22.5236	6.96967
7	-15	0	36.9748	1.13728	130.4	48	2.27275	18.3333	195.104	872	48.6667	18.1608	8.65764
3.5	-15	20	64.5833	0.176296	116.267	57.7333	3.3918	20.6209	169.863	1433.6	45.3333	13.794	7.24616
3.5	-15	20	55.7692	0.131714	111.067	64	3.44471	17.7451	218.182	1440.8	28.6667	14.0412	8.26183
3.5	-15	20	61.6162	0.223	106.933	57.2	3.47381	17.549	212.429	724	30.6667	19.796	7.80739
5.25	-15	20	55.6962	0.402036	113.067	69.6	3.47381	24.0523	157.078	1340	42.6667	16.0852	6.63613
5.25	-15	20	44.4444	0.225123	94.5333	51.4667	3.72249	17.7778	211.364	1680.8	42.6667	15.9408	6.79061
5.25	-15	20	55.5556	0.580364	100.667	60.9333	2.91296	15.6863	194.35	1405.6	56	20.3692	8.68853
7	-15	20	46.6019	0.446618	120.533	39.6	3.2754	18.1373	164.384	1125.6	65.3333	9.904	7.47844
7	-15	20	45.7627	0.486246	120.133	38.4	3.10873	19.5752	173.485	1165.6	52	10.5044	6.98881
7	-15	20	43.6364	0.422558	113.067	42.5333	3.04259	16.9608	187.571	1412.8	58.6667	12.1488	7.77869
3.5	-15	40	49	0.218755	126.267	41.0667	3.8627	13.5294	169.863	908	24.4	19.3032	9.62122
3.5	-15	40	53.6364	0.103408	99.2	45.6	3.36534	14.4771	193.939	963.2	24.6667	12.3364	8.11547
3.5	-15	40	57.5758	0.0623639	124.133	52	3.3627	15.4248	183.051	1207.2	24.6667	17.2848	9.37501
5.25	-15	40	62.0253	0.122514	124	48	2.65106	14.3464	185.388	1392.8	50	13.0432	10.1192
5.25	-15	40	60.4938	0.154358	101.067	55.8667	2.58228	14.9673	209.848	1526.4	62	13.3476	8.94228
5.25	-15	40	58.75	0.175588	103.467	57.6	2.70397	16.2092	192.09	928.8	46.6667	13.93	8.51613
7	-15	40	42.2222	0.405574	102.4	32.6667	3.04788	18.3333	178.082	1047.2	50	16.208	6.31707
7	-15	40	35.9551	0.404159	94.1333	38	3.04259	17.5163	190.152	1267.2	41.3333	16.992	6.42705
7	-15	40	39.1304	0.450864	107.733	35.2	2.74365	16.9608	191.337	1044	46.6667	18.4712	7.25387
3.5	-20	0	60.1852	0.11473	155.067	56.5333	3.57434	25.5229	210.208	1680	16.6667	8.322	7.27217
3.5	-20	0	52.8926	0.0963311	147.2	48.6667	4.06111	28.9869	200.36	1437.6	36	13.6604	5.92673
3.5	-20	0	49.5726	0.160727	137.467	42	4.23307	28.4641	195.185	1846.4	40	11.9888	5.48876
5.25	-20	0	51.5464	0.145159	111.2	29.3333	3.99497	26.1438	192.06	1277.6	27	14.032	4.66288
5.25	-20	0	52.0408	0.134544	104.4	30.1333	4.07698	24.0523	167.207	1473.6	23.3333	18.3508	4.78268
5.25	-20	0	50	0.148697	138.933	21.3333	4.53201	25.5229	186.196	1336	31.3333	13.1908	5.33247
7	-20	0	54.5455	0.0814704	148.133	31.7333	4.52937	23.4967	130.057	1400.8	29.3333	22.5276	6.41783
7	-20	0	52.5253	0.0821781	182.8	26	4.5955	25.9804	148.468	968.8	22	18.0396	6.82891
7	-20	0	36.7925	0.128883	146.4	29.4667	4.62725	26.0458	131.407	981.6	26	21.3628	5.7336
3.5	-20	20	51.4019	0.116853	136.4	36.8	4.73571	20.5882	226.339	1471.2	18.6667	8.6796	6.83938
3.5	-20	20	47.5	0.0956234	125.6	29.2	3.6881	20.0327	143.183	1304.8	24	12.9984	6.52593
3.5	-20	20	47.7477	0.135252	131.6	34.9333	5.06111	22.3203	155.377	1200	50	11.4204	6.08199
5.25	-20	20	44.0367	0.143744	137.2	31.4667	3.19339	24.6732	215.249	1351.2	25.3333	19.9444	6.05265
5.25	-20	20	46.729	0.252014	130.8	29.2	3.92354	23.0065	217.177	1167.2	36	11.666	5.94131
5.25	-20	20	43.1373	0.157897	152.533	28.6667	4.09286	20	183.628	1867.2	49.3333	15.5	7.5209
7	-20	20	50.5051	0.0496262	141.733	52	4.1537	26.0131	154.757	1368	21.3333	21.4924	6.42208
7	-20	20	53.7037	0.070148	121.2	36.4	3.94471	22.5817	138.378	1728	15	13.7772	5.94125
7	-20	20	47.8992	0.084301	141.867	29.0667	3.8336	21.3399	101.017	1286.4	8.66667	14.7056	6.79022
3.5	-20	40	68.75	0.110484	150.133	54.6667	3.68016	27.7778	189.54	1664.8	36	12.6624	6.51028
3.5	-20	40	58.0952	0.16002	136.133	39.2	3.50291	23.0719	168.168	1500	41.3333	11.4844	6.59773
3.5	-20	40	54.0541	0.0807628	155.6	37.2	3.8045	20.0327	181.915	1580.8	19.3333	13.3568	8.08821
5.25	-20	40	50.5882	0.0715633	137.2	30.1333	3.88122	24.7712	193.069	1273.6	24.6667	19.2924	5.8401
5.25	-20	40	47.8261	0.0779322	127.2	23.0667	3.46587	22.7778	159.52	1252.8	39.3333	15.3228	5.72583
5.25	-20	40	53.1532	0.0602409	130.667	19.7333	3.46587	22.2549	140.824	1052.8	36.6667	16.2312	5.84741
7	-20	40	52.6882	0.043965	164.133	26.1333	3.48175	23.7582	191.052	1189.6	37.3333	14.0644	6.98485
7	-20	40	55.7895	0.0574103	136.133	48.5333	4.12196	21.0784	139.339	1087.2	14.6667	16.8036	7.32793
7	-20	40	64.0351	0.0446726	170.267	21.2	3.52143	21.9935	145.104	1381.6	26	15.3776	7.50411
